# Supplementary material for: Predicting Maternal and Infant Tetrahydrocannabinol Exposure in Lactating Cannabis Users: A Physiologically Based Pharmacokinetic Modeling Approach
Source: MDPI journal article supplement (doi:10.3390/pharmaceutics15102467), 2023-10-14
Supplement: s1 [file s1]

## Predicting Maternal and Infant Tetrahydrocannabinol Exposure in Lactating Cannabis Users: A Physiologically Based Pharmacokinetic Modeling Approach

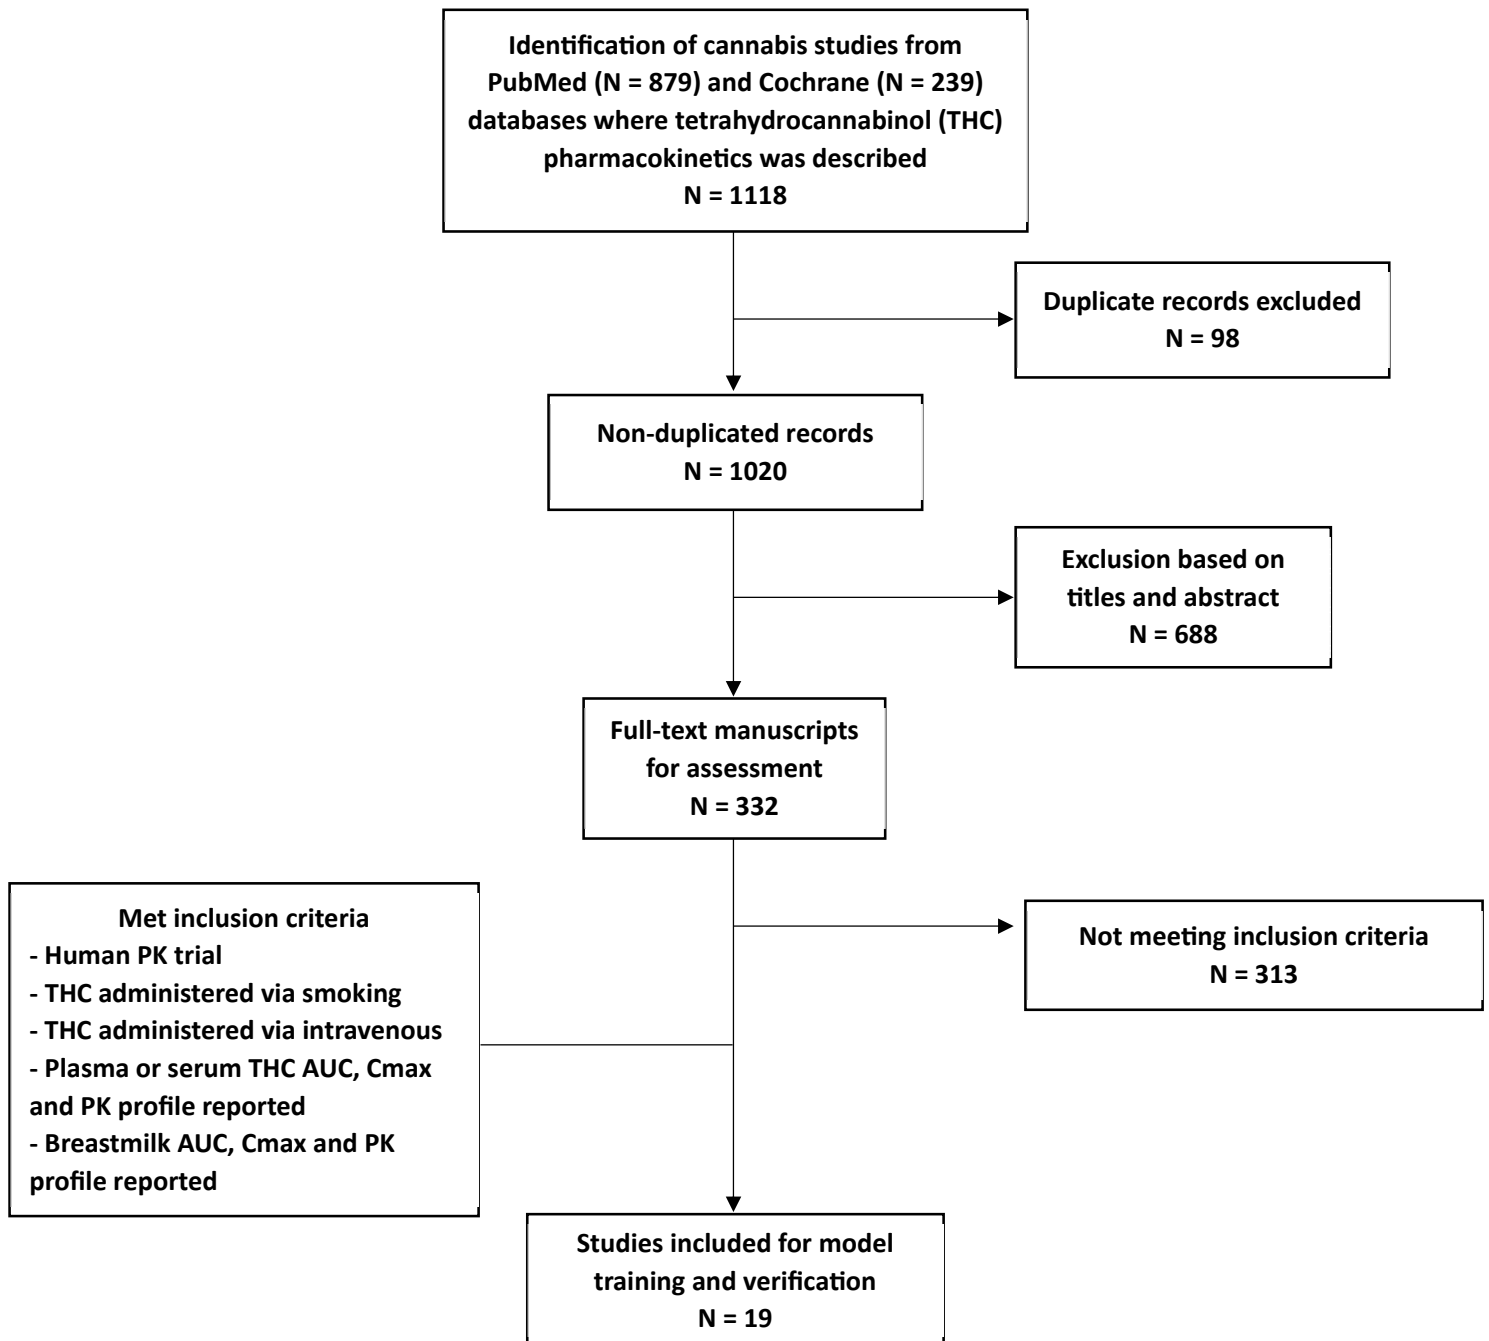

**Figure S1:** Flow chart of the literature review for training and verifying PBPK model predictions.
